# Supplementary material for: Cluster-Randomized Controlled Trial of Reducing Seclusion and Restraint in Secured Care of Men With Schizophrenia
Source: Atypon-hosted journal article supplement (doi:10.1176/appi.ps.201200393), 2013-06-17
Supplement: 850_ds001.pdf [file 850_ds001.pdf]

**Appendix****Proportion of patients receiving specific antipsychotic medications between 2006 and 2009 in Niuvanniemi Hospital**

|                          | 2006 | 2007 | 2008 | 2009 |
|--------------------------|------|------|------|------|
|                          | %    | %    | %    | %    |
| clozapine                | 68   | 70   | 68   | 70   |
| olanzapine               | 34   | 32   | 30   | 28   |
| aripiprazole             | 13   | 12   | 9    | 8    |
| risperidone              | 11   | 12   | 4    | 7    |
| quetiapine respectively  | 11   | 16   | 15   | 11   |
| 2 or more antipsychotics | 7    | 6    | 10   | 6    |
| lamotrigine              | 25   | 26   | 24   | 25   |
| topiramate               | 19   | 17   | 14   | 12   |
| valproate                | 13   | 14   | 16   | 15   |
| lithium                  | 14   | 16   | 14   | 13   |

## CONSORT Flow Diagram: A cluster-randomized controlled study of seclusion and restraint reduction at Niuvanniemi Hospital

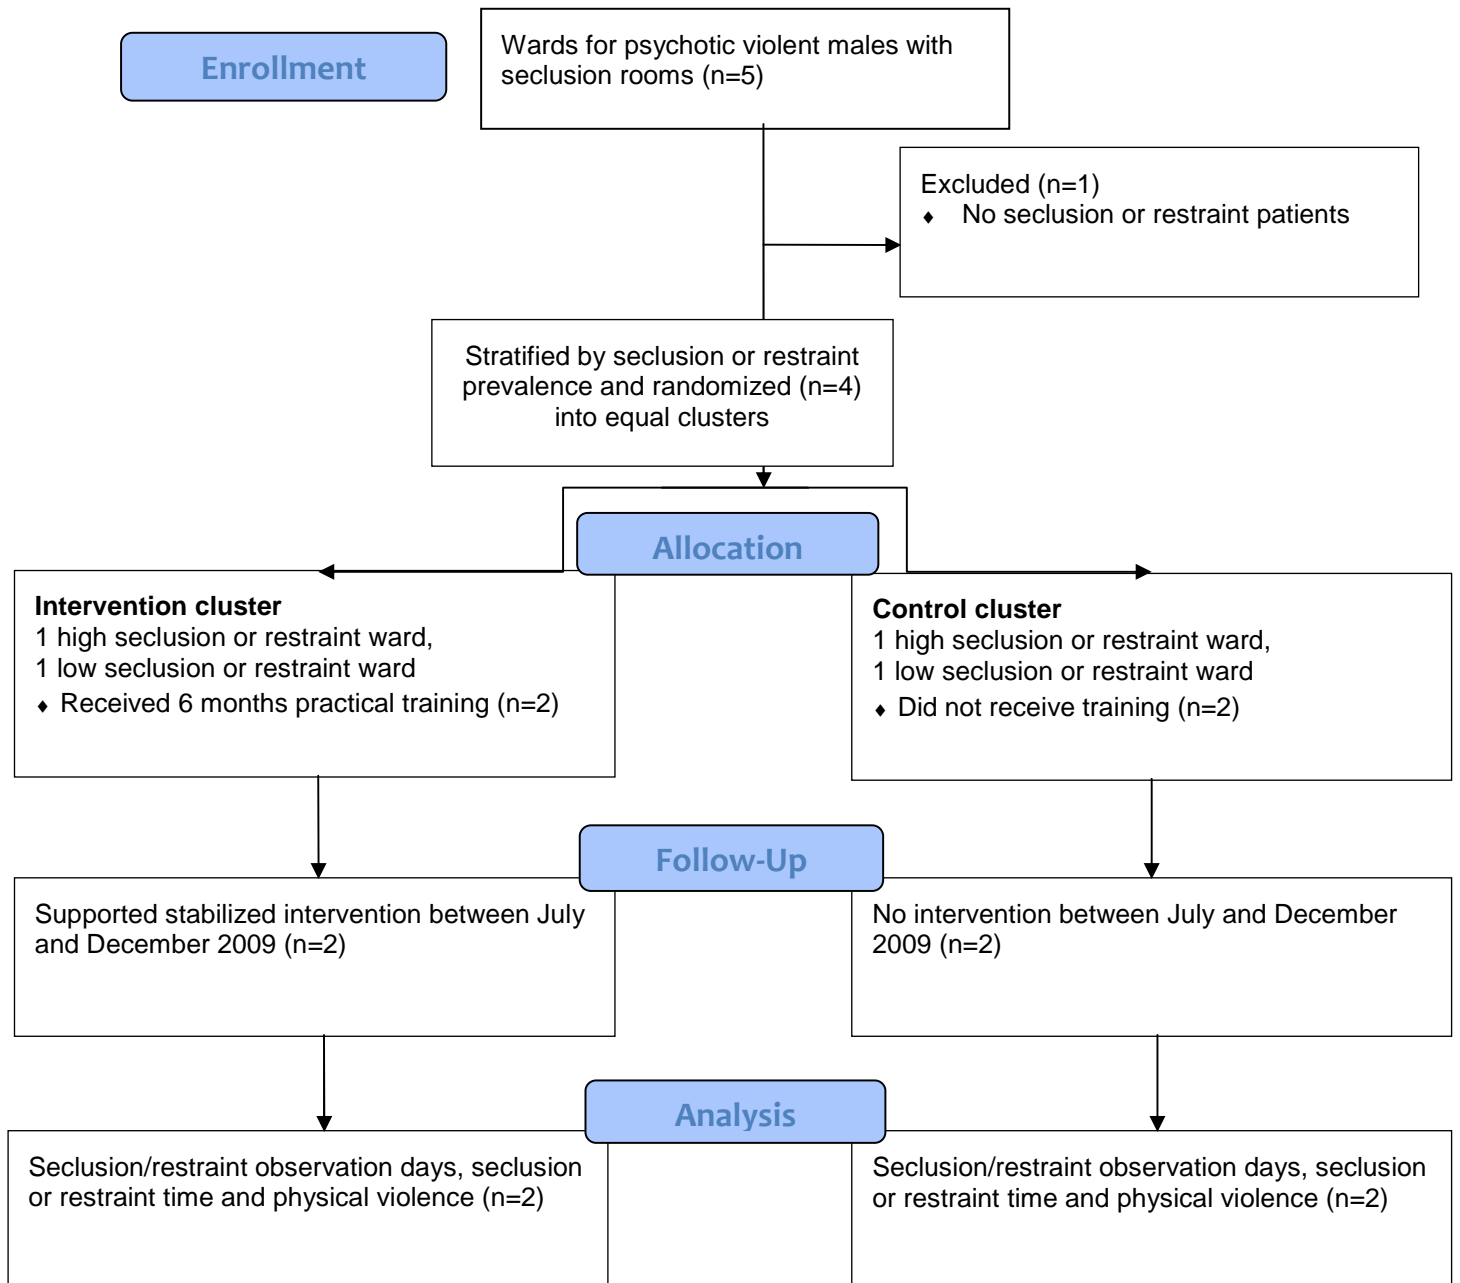

**Monthly seclusion–restraint–room observation days, seclusion–restraint time, and violent incidents in the intervention group and control group during the stabilized intervention in 2009**

| Outcome measure                                        | Month | Intervention group |                       |                      | Control group |                       |                      |
|--------------------------------------------------------|-------|--------------------|-----------------------|----------------------|---------------|-----------------------|----------------------|
|                                                        |       | N                  | total of patient days | per 100 patient days | N             | total of patient days | per 100 patient days |
| Seclusion/restraint/room observation days <sup>1</sup> | Jul   | 387                | 1306                  | 29.6                 | 237           | 960                   | 24.6                 |
|                                                        | Aug   | 337                | 1370                  | 24.5                 | 175           | 1003                  | 17.4                 |
|                                                        | Sep   | 305                | 1333                  | 22.8                 | 180           | 923                   | 19.5                 |
|                                                        | Oct   | 280                | 1380                  | 20.2                 | 185           | 980                   | 18.8                 |
|                                                        | Nov   | 233                | 1317                  | 17.6                 | 179           | 928                   | 19.2                 |
|                                                        | Dec   | 210                | 1400                  | 15.0                 | 176           | 924                   | 19.0                 |
| Seclusion/restraint time <sup>2</sup>                  | Jul   | 1440               | 1306                  | 110                  | 1272          | 960                   | 133                  |
|                                                        | Aug   | 2160               | 1370                  | 158                  | 792           | 1003                  | 79                   |
|                                                        | Sep   | 1176               | 1333                  | 88                   | 1872          | 923                   | 202                  |
|                                                        | Oct   | 1248               | 1380                  | 90                   | 2064          | 980                   | 210                  |
|                                                        | Nov   | 984                | 1317                  | 74                   | 1704          | 928                   | 184                  |
|                                                        | Dec   | 792                | 1400                  | 56                   | 1392          | 924                   | 151                  |
| Violent incidents <sup>3</sup>                         | Jul   | 14                 | 1306                  | 1.1                  | 1             | 960                   | .1                   |
|                                                        | Aug   | 11                 | 1370                  | .8                   | 3             | 1003                  | .3                   |
|                                                        | Sep   | 8                  | 1333                  | .6                   | 4             | 923                   | .4                   |
|                                                        | Oct   | 12                 | 1380                  | .9                   | 3             | 980                   | .3                   |
|                                                        | Nov   | 13                 | 1317                  | 1.0                  | 2             | 928                   | .2                   |
|                                                        | Dec   | 6                  | 1400                  | .4                   | 0             | 924                   | .0                   |

<sup>1</sup> Patient days when any seclusion, restraint or room observation was used.

<sup>2</sup> Patient time (hours) in seclusion or restraint.

<sup>3</sup> Physical violent incidents against patients or staff.
